# Supplementary material for: Partial Atomic Model of the Tailed Lactococcal Phage TP901-1 as Predicted by AlphaFold2: Revelations and Limitations
Source: MDPI journal article supplement (doi:10.3390/v15122440), 2023-12-15
Supplement: s1 [file s1]

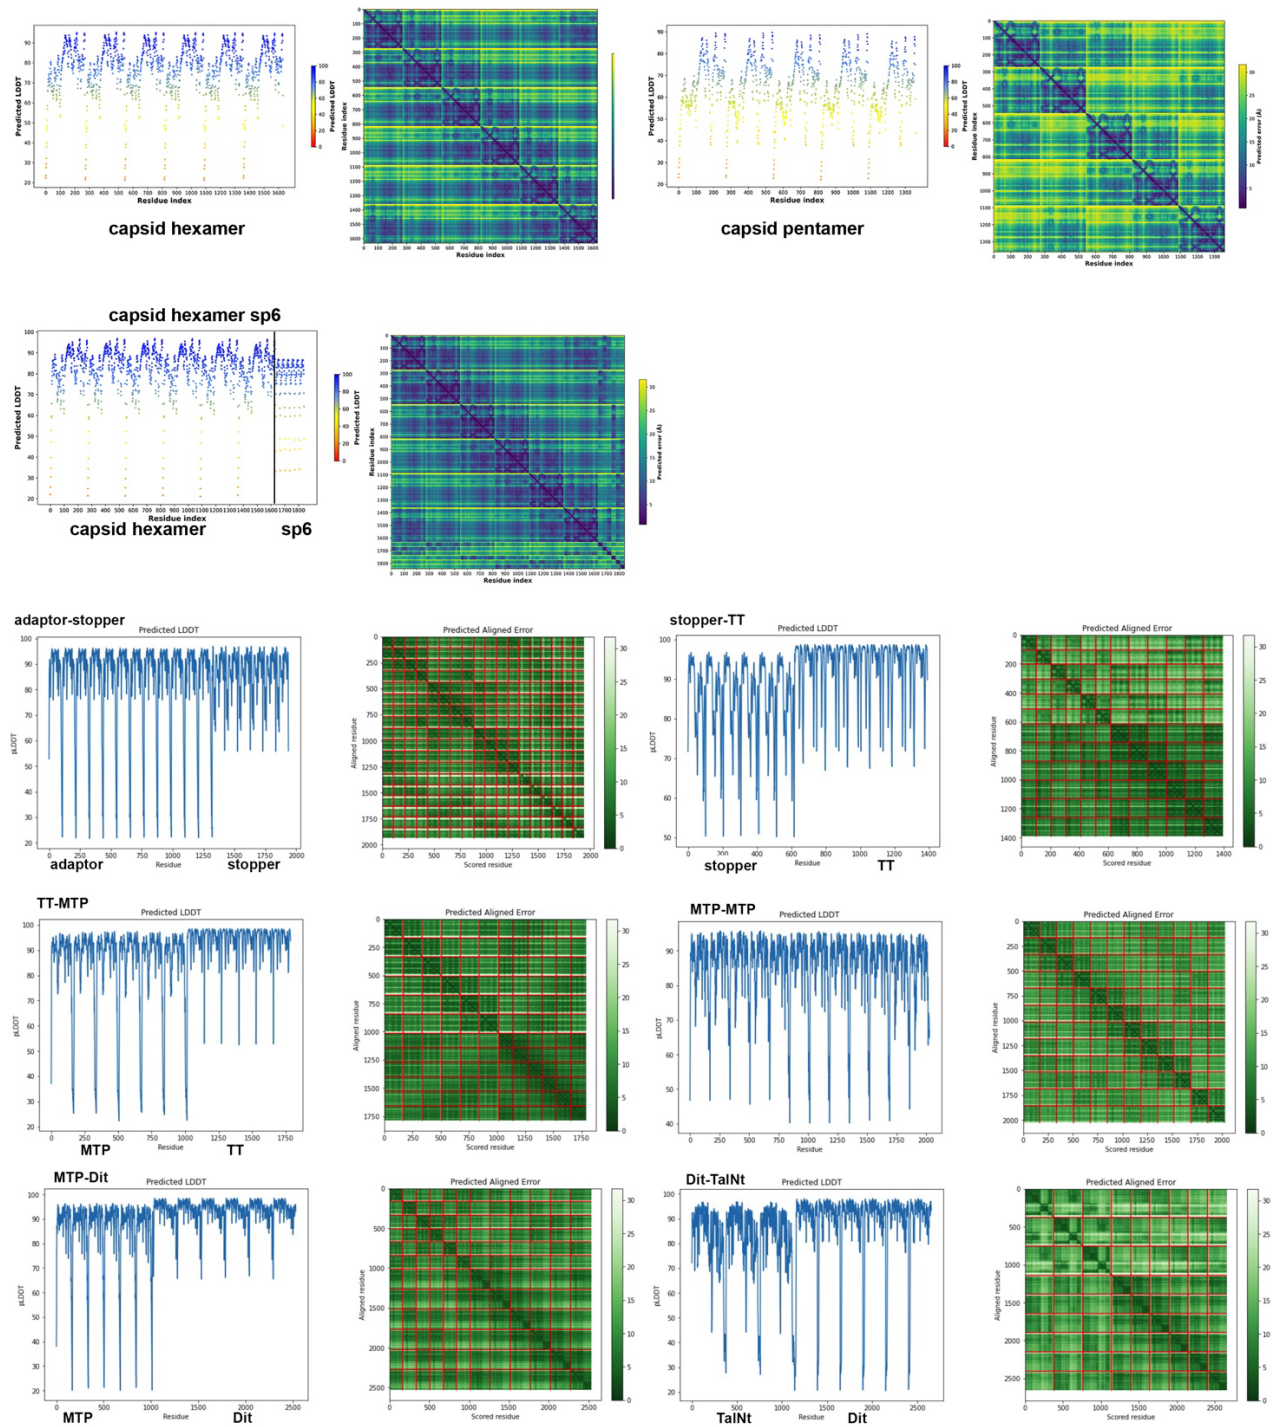

**Supplementary Figure S1:** AlphaFold predicted local distance difference test (pLDDT) and predicted aligned errors (PAE) of the complexes between TP901-1 components.

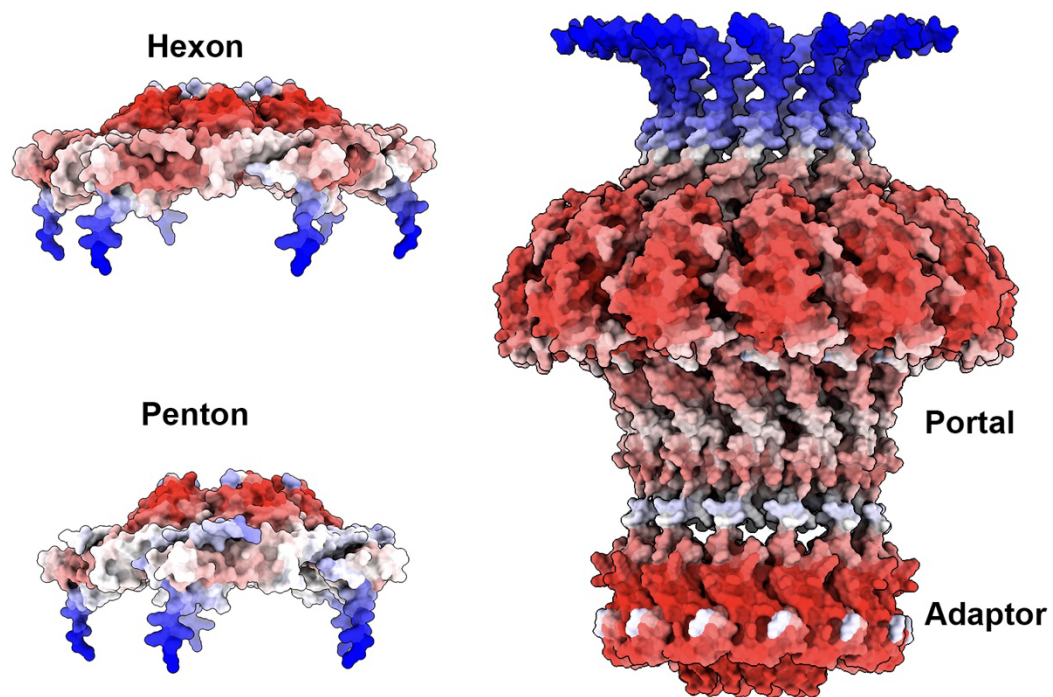

**Supplementary Figure S2:** AlphaFold predicted structures of the capsid's hexon and penton and the portal dodecamer colored according to the pLDDT values (from low , blue to high, red).

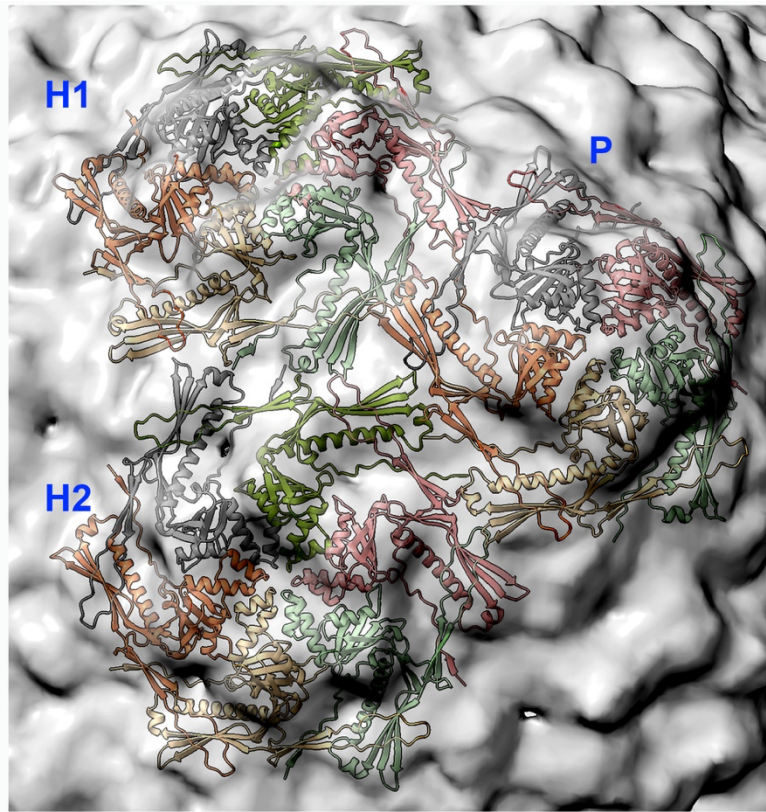

**Supplementary Figure S3:** Ribbon view of the structures of two hexons (H1 and H2) and one penton (P) fitted in the nsEM 3D reconstruction (EMD-2133).



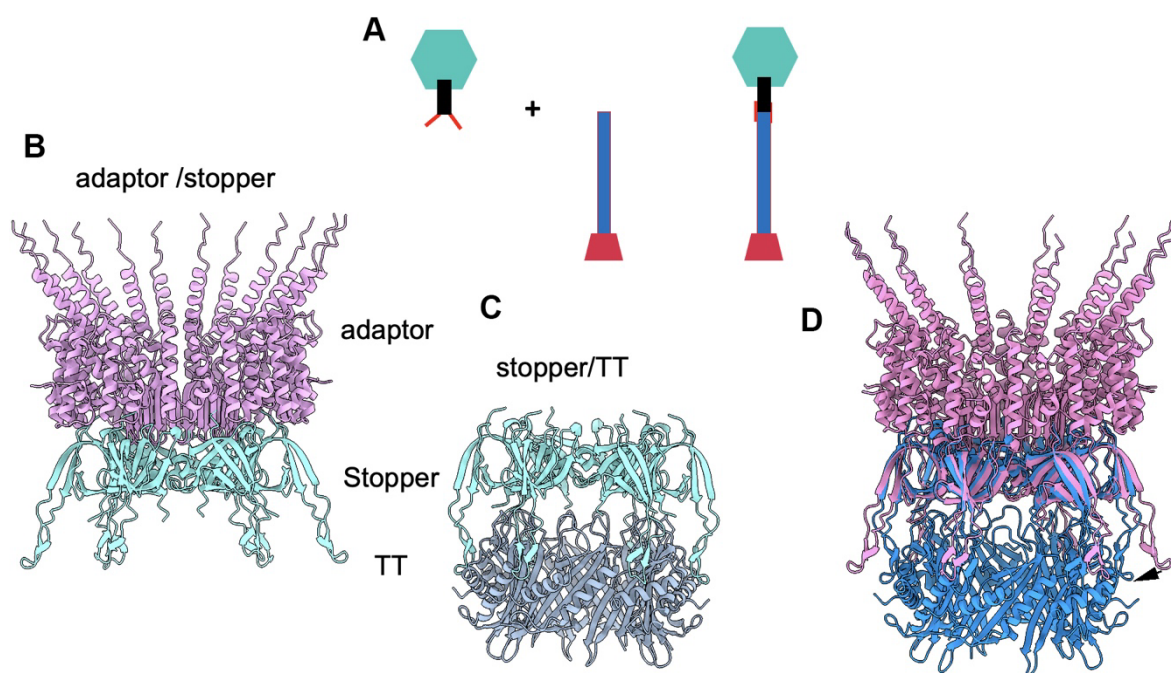

**Supplementary Figure S4: The capsid-neck assembly with the tail-baseplate.** (A) Schematic representation of the last step of a siphophage assembly. The capsid-neck and the tail-baseplate ensembles are assembled separately and joined together in a last step through a stopper/tail-terminator contact. (B) Ribbon view of the dodecameric adaptor (pink) and the hexameric stopper (blue) complex. (C) Ribbon view of the hexameric stopper (blue) and the hexameric tail-terminator (TT; grey) complex. (D) Superposition of the ribbon view of the dodecameric adaptor and the hexameric stopper complex (blue) on the hexameric stopper and the hexameric tail-terminator (TT) complex (blue). Note how the b-hairpins of the stopper rotate (by 20°) to contact the TT (black arrow on the left side).

**Supplementary Video S1:** ChimeraX [33] morphing of the stopper (top) / tail-terminator (bottom) docking. Representation of atoms as spheres.

[33] Pettersen, E. F., T. D. Goddard, C. C. Huang, G. S. Couch, D. M. Greenblatt, E. C. Meng, and T. E. Ferrin. "Ucsf Chimera--a Visualization System for Exploratory Research and Analysis." *J Comput Chem* 25, no. 13 (2004): 1605-12.
